# Supplementary material
Source: PubMed Central journal article supplement (PMC4752920)
Supplement: NIHMS750789-supplement.pdf [file NIHMS750789-supplement.pdf]

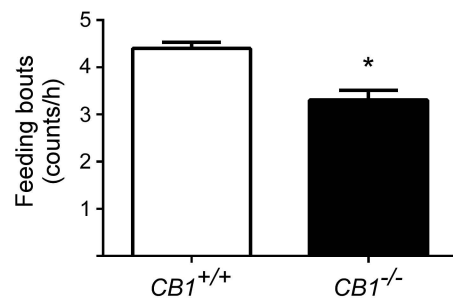

**Figure S1. Food consumption of  $CB1^{-/-}$  mice.**  $CB1^{+/+}$  (white bar) and  $CB1^{-/-}$  (black bar) mice were placed in metabolic cages for 48 h. Feeding behaviors were recorded and analyzed as feeding bouts per hour in a total period of 24 h. Data are mean  $\pm$  SEM (n=5-7/group). \* $p < 0.05$ .

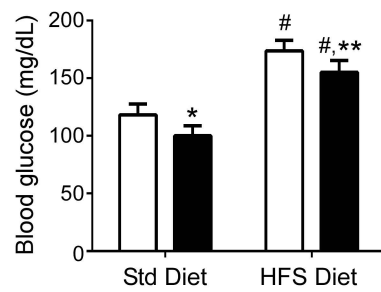

**Figure S2. Fasting blood glucose in CB1<sup>-/-</sup> mice.** CB1<sup>+/+</sup> (white bars) and CB1<sup>-/-</sup> (black bars) mice maintained on a standard diet (SD) or high fat/high sugar diet (HFS) were fasted overnight. Data are mean  $\pm$  SEM (n=5-7/group). \*p < 0.05 and \*\*p < 0.01 compared to CB1<sup>+/+</sup> mice; #p < 0.01 compared to SD.

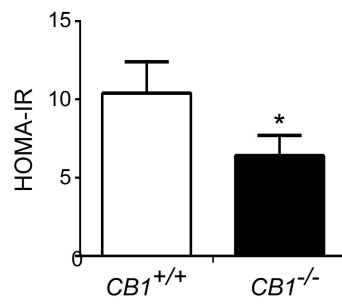

**Figure S3. HOMA-IR in  $CB1^{-/-}$  mice fed a high fat/high sugar diet.**  $CB1^{+/+}$  (white bar) and  $CB1^{-/-}$  (black bar) mice maintained on a high fat/high sugar diet were fasted overnight and HOMA-IR calculated. Data are mean  $\pm$  SEM (n=5-7/group). \*p < 0.05.

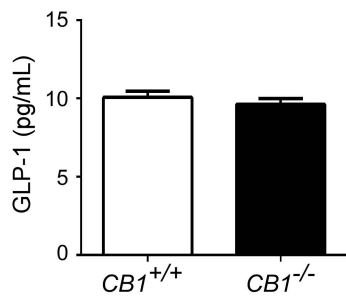

**Figure S4. Fasting plasma GLP-1 levels after GLP-1 infusion are similar in WT and CB1KO.** WT and CB1KO mice infused with 1.5 pmol/kg·h of GLP-1 for 36 h were fasted and plasma collected. Plasma levels of GLP-1 were measured by ELISA. Data are mean  $\pm$  SEM, n=3.

**A**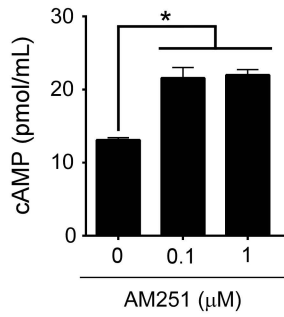**B**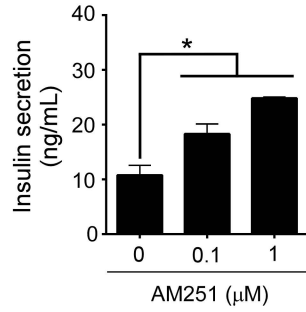

**Figure S5. CB1 inverse agonists increase intracellular cAMP accumulation in  $\beta\text{TC6}$  cells.** Relative intracellular cAMP concentrations (A) and insulin secretion (B) from  $\beta\text{TC6}$  cells treated with the inverse agonist AM251. All values were normalized to protein concentration. Data are mean  $\pm$  SEM,  $n=3$ . \* $p < 0.05$ .

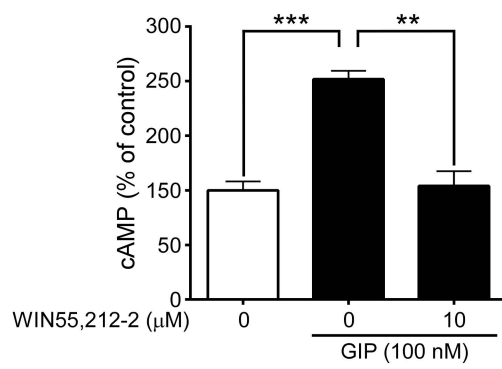

**Figure S6. The CB1 specific agonist WIN55,212-2 modulates GIP-mediated intracellular cAMP accumulation in  $\beta$ TC6 cells.** Relative intracellular cAMP concentrations from  $\beta$ TC6 cells treated with the synthetic cannabinoid WIN55,212-2 before subsequent addition of GIP (100 nM). All values were normalized to protein concentration and represented as percentage to unstimulated cells. Data are mean  $\pm$  SEM, n=3. \*\*p < 0.01; \*\*\*p < 0.001.

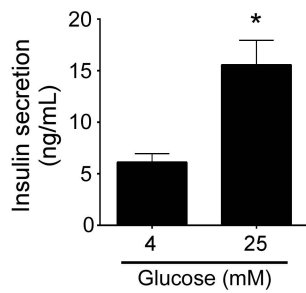

**Figure S7. Basal and stimulatory insulin secretion from MIN6 cells.** MIN6 cells were cultured with 4 mM of glucose or stimulated with 25 mM of glucose and media was analyzed for insulin. Data are mean  $\pm$  SEM (n=3). \*p < 0.05.

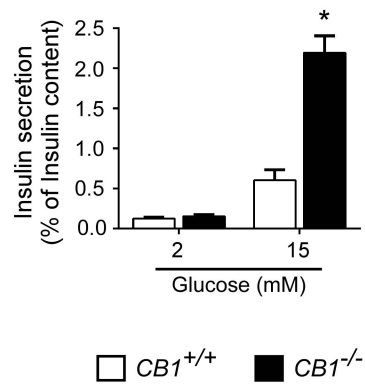

**Figure S8. Insulin secretion from  $CB1^{-/-}$  isolated islets.** Islets isolated from  $CB1^{+/+}$  (white bar) and  $CB1^{-/-}$  (black bar) mice pre-cultured at 2 mM glucose were stimulated with 15 mM of glucose and media was analyzed for insulin. Data are mean  $\pm$  SEM (n=3). \*p < 0.05.
